# Supplementary material
Source: MDPI journal article supplement (https://www.mdpi.com/2071-1050/15/13/10051)
Supplement: s1 [file s1]

Archive with 2 entries (2 files):
- DEXi Report_NevadaFuelshed.pdf
- DEXi Report_SouthForkWatershed.pdf
