# Supplementary material
Source: MDPI journal article supplement (https://www.mdpi.com/2071-1050/15/13/10051)
Supplement: s1 [file s1 › DEXi Report_NevadaFuelshed.pdf]

## Model description

Iowa Landscape Design MADSS: Nevada Fuelshed

This Multi-Attribute Decision Support System (MADSS) was built by Oak Ridge National Laboratory (ORNL) to evaluate the relative sustainability of four alternative landscapes considered by the Antares-led Iowa Landscape Design project consortium for the US Department of Energy (DOE) BioEnergy Technologies Office (BETO). The model was built using quantitative results from ArcGIS analyses of the 50-mile fuelshed area around a commercial cellulosic biorefinery located in Nevada, Iowa. The analyses were based on subfield-scale results output from combinations of Profit Zone Manager (PZM) calculations for 2013-2016 and 7 AgSolver management scenarios developed by EFC Systems and provided to Antares Group LLC.

Please contact Dr. Esther Parish of ORNL at [parishes@ornl.gov](mailto:parishes@ornl.gov) for further information.

## Attribute tree

| Attribute                         | Description                                                                                                                         |
|-----------------------------------|-------------------------------------------------------------------------------------------------------------------------------------|
| <b>Landscape Sustainability</b>   | Aggregation of indicators derived from AgSolver runs prepared for the Antares Iowa Landscape Design project.                        |
| └ <b>Environmental Indicators</b> | Measurements related to biodiversity habitat, soil quality and water quality                                                        |
| ├ └ Biodiversity                  | Additional grassland acres for birds and pollinators; includes switchgrass plantings and Conservation Reserve Program (CRP) grasses |
| ├ └ <b>Soil Quality</b>           | Indicators of soil quality                                                                                                          |
| ├ │ └ Soil condition              | Soil conditioning index (SCI)                                                                                                       |
| ├ │ └ <b>Soil retention</b>       | Avoided soil erosion by wind and water (total tons)                                                                                 |
| ├ │ │ └ water erosion             | Tons of soil eroded by water across the area on an annual basis                                                                     |
| ├ │ │ └ wind erosion              | Tons of soil eroded by wind across the area on an annual basis                                                                      |
| ├ └ Water quality                 | Reduced levels of nitrate leaching (pounds NO <sub>3</sub> avoided in water bodies)                                                 |
| └ <b>Socioeconomic Indicators</b> | Measures related to feedstock availability, management inputs and climate change                                                    |
| ├ └ <b>Biomass availability</b>   | Feedstock availability for food and fuel                                                                                            |
| ├ │ └ corn grain                  | Average yield of corn harvested from 2013-2016                                                                                      |
| ├ │ └ corn residues               | Corn stover removed from fields with slopes < 5% and average corn yields >= 165 bu/acre                                             |
| ├ │ └ switchgrass                 | Switchgrass harvested from perennial fields (tons/acre)                                                                             |
| ├ │ └ rye cover crop              | Rye cover crop planted on top of corn                                                                                               |
| ├ └ <b>Climate change</b>         | Net carbon loss and/or sequestration                                                                                                |
| ├ │ └ soil carbon                 | Net change in soil organic carbon (SOC) in pounds/year                                                                              |
| ├ │ └ methane emissions           | CH <sub>4</sub> released from agricultural fields (net flux in in pounds/year)                                                      |
| └ Fertilizer application          | Volume of ammonia added to fields through injection (lbs NO <sub>3</sub> )                                                          |

# Scales

| Attribute                       | Scale                                                                                                                                                  |
|---------------------------------|--------------------------------------------------------------------------------------------------------------------------------------------------------|
| <b>Landscape Sustainability</b> | <b>adverse impacts</b> ; mixed results; status quo; <b>some benefit</b> ; <b>multiple benefits</b>                                                     |
| <b>Environmental Indicators</b> | <b>declining environmental conditions</b> ; mixed environmental conditions; <b>improving environmental conditions</b>                                  |
| Biodiversity                    | no grassland added; <b>switchgrass plantings</b> ; <b>switchgrass plantings + CRP acres</b>                                                            |
| <b>Soil Quality</b>             | <b>deteriorating soil quality</b> ; stable soil quality; <b>improving soil quality</b>                                                                 |
| Soil condition                  | <b>negative SCI value</b> ; <b>positive SCI value</b> ; <b>SCI value &gt; 0.5</b>                                                                      |
| <b>Soil retention</b>           | current soil erosion rate; <b>reduction in wind OR water erosion</b> ; <b>reduction in wind AND water erosion</b>                                      |
| water erosion                   | current soil erosion rate; <b>up to 25% reduction</b> ; <b>25-50% reduction</b> ; <b>&gt; 50% reduction</b>                                            |
| wind erosion                    | current soil erosion rate; <b>up to 25% reduction</b> ; <b>25-50% reduction</b> ; <b>&gt; 50% reduction</b>                                            |
| Water quality                   | <b>current leaching rate</b> ; up to 25% reduction; <b>25-50% reduction</b> ; <b>&gt; 50% reduction</b>                                                |
| <b>Socioeconomic Indicators</b> | <b>increased costs to stakeholders</b> ; mixed results for stakeholders; status quo; <b>stakeholder benefit</b> ; <b>multiple stakeholder benefits</b> |
| <b>Biomass availability</b>     | <b>decreased food availability</b> ; status quo (no cellulosic bioenergy); <b>feedstock available for food &amp; fuel</b>                              |
| corn grain                      | <b>decreased corn yield</b> ; average corn yield; <b>increased corn yield</b>                                                                          |
| corn residues                   | no stover removals; <b>30% stover removal</b> ; <b>45% stover removal</b>                                                                              |
| switchgrass                     | no switchgrass plantings; <b>switchgrass plantings</b>                                                                                                 |
| rye cover crop                  | no cover crop; <b>cover crop</b>                                                                                                                       |
| <b>Climate change</b>           | <b>worsening GHGs</b> ; mixed results; status quo; <b>improving GHGs</b>                                                                               |
| soil carbon                     | <b>loss of soil carbon</b> ; <b>increase in soil carbon</b> ; <b>carbon sequestered</b>                                                                |
| methane emissions               | <b>increased emissions</b> ; status quo                                                                                                                |
| Fertilizer application          | <b>increased fertilizer use</b> ; average fertilizer use; <b>decreased fertilizer use</b>                                                              |

## Landscape Sustainability

Aggregation of indicators derived from AgSolver runs prepared for the Antares Iowa Landscape Design project.

1. **adverse impacts**
2. mixed results
3. status quo
4. **some benefit**
5. **multiple benefits**

## Environmental Indicators

Measurements related to biodiversity habitat, soil quality and water quality

1. **declining environmental conditions**
2. mixed environmental conditions
3. **improving environmental conditions**

## Biodiversity

Additional grassland acres for birds and pollinators; includes switchgrass plantings and Conservation Reserve Program (CRP) grasses

1. no grassland added No switchgrass plantings or additional CRP acres
2. **switchgrass plantings** Switchgrass planted on clustered low ROI acres
3. **switchgrass plantings + CRP acres** Switchgrass planted on clustered low ROI acres; remaining low ROI acres enrolled in CRP

## Soil Quality

Indicators of soil quaility

1. **deteriorating soil quality** based on SCI and erosion rates
2. stable soil quality based on SCI and erosion rates
3. **improving soil quality** based on SCI and erosion rates

## Soil condition

Soil conditioning index (SCI)

1. **negative SCI value** Loss of soil organic matter
2. **positive SCI value** Increase in soil organic matter
3. **SCI value > 0.5** Large increase in soil organic matter

## Soil retention

Avoided soil erosion by wind and water (total tons)

1. current soil erosion rate tons of soil eroded under basecase conditions
2. **reduction in wind OR water erosion** tons of sediment eroded relative to basecase
3. **reduction in wind AND water erosion** tons of sediment eroded relative to basecase

## water erosion

Tons of soil eroded by water across the area on an annual basis

1. current soil erosion rate tons of soil eroded under basecase conditions
2. **up to 25% reduction** tons of sediment eroded relative to basecase
3. **25-50% reduction** tons of sediment eroded relative to basecase
4. **> 50% reduction** tons of sediment eroded relative to basecase

## wind erosion

Tons of soil eroded by wind across the area on an annual basis

1. current soil erosion rate tons of soil eroded under basecase conditions
2. **up to 25% reduction** tons of sediment eroded relative to basecase
3. **25-50% reduction** tons of sediment eroded relative to basecase
4. **> 50% reduction** tons of sediment eroded relative to basecase

## Water quality

Reduced levels of nitrate leaching (pounds NO<sub>3</sub> avoided in water bodies)

1. **current leaching rate** pounds of NO<sub>3</sub> leached under basecase conditions
2. up to 25% reduction pounds of NO<sub>3</sub> leached relative to baseline
3. **25-50% reduction** pounds of NO<sub>3</sub> leached relative to baseline
4. **> 50% reduction** pounds of NO<sub>3</sub> leached relative to baseline

## Socioeconomic Indicators

Measures related to feedstock availability, management inputs and climate change

1. **increased costs to stakeholders** includes food insecurity and/or increased climate change contributions
2. mixed results for stakeholders
3. status quo
4. **stakeholder benefit**
5. **multiple stakeholder benefits** includes feedstock diversity, GHG reductions, and/or reduced inputs

## Biomass availability

Feedstock availability for food and fuel

1. **decreased food availability** marked decrease in corn yields and/or acres
2. status quo (no cellulosic bioenergy) all modeled acres allocated to corn/soy rotation
3. **feedstock available for food & fuel** switchgrass and stover removals integrated with corn/soy

## corn grain

Average yield of corn harvested from 2013-2016

1. **decreased corn yield**
2. average corn yield average bushels/acre across modeled area
3. **increased corn yield**

## corn residues

Corn stover removed from fields with slopes < 5% and average corn yields >= 165 bu/acre

1. no stover removals
2. **30% stover removal**
3. **45% stover removal**

## switchgrass

Switchgrass harvested from perennial fields (tons/acre)

1. no switchgrass plantings all acres left in traditional corn/soy rotation
2. **switchgrass plantings** switchgrass replacing corn on clustered low ROI lands

## rye cover crop

Rye cover crop planted on top of corn

1. no cover crop no rye planted over corn
2. **cover crop** rye cover crop assumed to yield 4000 lb/acre

## Climate change

Net carbon loss and/or sequestration

1. **worsening GHGs** lower SOC & larger CH<sub>4</sub> release
2. mixed results opposite trends between SOC & methane emissions
3. status quo no change from basecase values
4. **improving GHGs** increased SOC & smaller CH<sub>4</sub> release

## soil carbon

Net change in soil organic carbon (SOC) in pounds/year

1. **loss of soil carbon** total net change in SOC is negative across the area
2. **increase in soil carbon** net positive change in SOC across the area
3. **carbon sequestered** magnitude of net SOC gain more than offsets magnitude of net loss under basecase

## methane emissions

CH<sub>4</sub> released from agricultural fields (net flux in in pounds/year)

1. **increased emissions** Larger release of methane across the modeled land area
2. status quo Basecase methane emission levels

## Fertilizer application

Volume of ammonia added to fields through injection (lbs NO<sub>3</sub>)

1. **increased fertilizer use** larger volume of NH<sub>3</sub> relative to basecase
2. average fertilizer use basecase NH<sub>3</sub> volume
3. **decreased fertilizer use** smaller volume of NH<sub>3</sub> relative to basecase

## Functions

| Attribute                         | Rules | Defined | Determined | Values                                                                                                                                 |
|-----------------------------------|-------|---------|------------|----------------------------------------------------------------------------------------------------------------------------------------|
| <b>Landscape Sustainability</b>   | 15/15 | 100.00% | 100.00%    | adverse impacts:4,mixed results:3,status quo:2,some benefit:4,multiple benefits:2                                                      |
| └ <b>Environmental Indicators</b> | 36/36 | 100.00% | 100.00%    | declining environmental conditions:4,mixed environmental conditions:15,improving environmental conditions:17                           |
| └└ Biodiversity                   |       |         |            |                                                                                                                                        |
| └└ <b>Soil Quality</b>            | 9/9   | 100.00% | 100.00%    | deteriorating soil quality:3,stable soil quality:1,improving soil quality:5                                                            |
| └└└ Soil condition                |       |         |            |                                                                                                                                        |
| └└└ <b>Soil retention</b>         | 16/16 | 100.00% | 100.00%    | current soil erosion rate:1,reduction in wind OR water erosion:6,reduction in wind AND water erosion:9                                 |
| └└└└ water erosion                |       |         |            |                                                                                                                                        |
| └└└└ wind erosion                 |       |         |            |                                                                                                                                        |
| └└ Water quality                  |       |         |            |                                                                                                                                        |
| └ <b>Socioeconomic Indicators</b> | 36/36 | 100.00% | 100.00%    | increased costs to stakeholders:11,mixed results for stakeholders:13,status quo:2,stakholder benefit:5,multiple stakeholder benefits:5 |
| └└ <b>Biomass availability</b>    | 36/36 | 100.00% | 100.00%    | decreased food availability:12,status quo (no cellulosic bioenergy):4,feedstock available for food & fuel:20                           |
| └└└ corn grain                    |       |         |            |                                                                                                                                        |
| └└└ corn residues                 |       |         |            |                                                                                                                                        |
| └└└ switchgrass                   |       |         |            |                                                                                                                                        |
| └└└ rye cover crop                |       |         |            |                                                                                                                                        |
| └└└ <b>Climate change</b>         | 6/6   | 100.00% | 100.00%    | worsening GHGs:2,mixed results:2,status quo:0,improving GHGs:2                                                                         |
| └└└└ soil carbon                  |       |         |            |                                                                                                                                        |
| └└└└ methane emissions            |       |         |            |                                                                                                                                        |
| └└ Fertilizer application         |       |         |            |                                                                                                                                        |

## Tables

| Environmental Indicators                    | Socioeconomic Indicators                  | Landscape Sustainability |
|---------------------------------------------|-------------------------------------------|--------------------------|
| 70%                                         | 30%                                       |                          |
| 1 <b>declining environmental conditions</b> | <=status quo                              | <b>adverse impacts</b>   |
| 2 <=mixed environmental conditions          | <b>increased costs to stakeholders</b>    | <b>adverse impacts</b>   |
| 3 <b>declining environmental conditions</b> | >= <b>stakholder benefit</b>              | mixed results            |
| 4 <b>improving environmental conditions</b> | <b>increased costs to stakeholders</b>    | mixed results            |
| 5 mixed environmental conditions            | mixed results for stakeholders:status quo | status quo               |
| 6 mixed environmental conditions            | >= <b>stakholder benefit</b>              | <b>some benefit</b>      |
| 7 <b>improving environmental conditions</b> | mixed results for stakeholders:status quo | <b>some benefit</b>      |
| 8 <b>improving environmental conditions</b> | >= <b>stakholder benefit</b>              | <b>multiple benefits</b> |

| Biodiversity                                | Soil Quality                      | Water quality                | Environmental Indicators                  |
|---------------------------------------------|-----------------------------------|------------------------------|-------------------------------------------|
| 17%                                         | 51%                               | 33%                          |                                           |
| 1 no grassland added                        | <b>deteriorating soil quality</b> | <=up to 25% reduction        | <b>declining environmental conditions</b> |
| 2 no grassland added                        | <=stable soil quality             | <b>current leaching rate</b> | <b>declining environmental conditions</b> |
| 3 <= <b>switchgrass plantings</b>           | <b>deteriorating soil quality</b> | <b>current leaching rate</b> | <b>declining environmental conditions</b> |
| 4 *                                         | <b>deteriorating soil quality</b> | >= <b>25-50% reduction</b>   | mixed environmental conditions            |
| 5 no grassland added                        | stable soil quality               | up to 25% reduction          | mixed environmental conditions            |
| 6 *                                         | <b>improving soil quality</b>     | <b>current leaching rate</b> | mixed environmental conditions            |
| 7 >= <b>switchgrass plantings</b>           | <b>deteriorating soil quality</b> | >=up to 25% reduction        | mixed environmental conditions            |
| 8 >= <b>switchgrass plantings</b>           | >=stable soil quality             | <b>current leaching rate</b> | mixed environmental conditions            |
| 9 <b>switchgrass plantings + CRP acres</b>  | <b>deteriorating soil quality</b> | *                            | mixed environmental conditions            |
| 10 <b>switchgrass plantings + CRP acres</b> | *                                 | <b>current leaching rate</b> | mixed environmental conditions            |
| 11 *                                        | >=stable soil quality             | >= <b>25-50% reduction</b>   | <b>improving environmental conditions</b> |
| 12 *                                        | <b>improving soil quality</b>     | >=up to 25% reduction        | <b>improving environmental conditions</b> |
| 13 >= <b>switchgrass plantings</b>          | >=stable soil quality             | >=up to 25% reduction        | <b>improving environmental conditions</b> |

| Soil condition                 | Soil retention                               | Soil Quality                      |
|--------------------------------|----------------------------------------------|-----------------------------------|
| 86%                            | 14%                                          |                                   |
| 1 <b>negative SCI value</b>    | *                                            | <b>deteriorating soil quality</b> |
| 2 <b>positive SCI value</b>    | current soil erosion rate                    | stable soil quality               |
| 3 >= <b>positive SCI value</b> | >= <b>reduction in wind OR water erosion</b> | <b>improving soil quality</b>     |
| 4 <b>SCI value &gt; 0.5</b>    | *                                            | <b>improving soil quality</b>     |

| water erosion                   | wind erosion                  | Soil retention                             |
|---------------------------------|-------------------------------|--------------------------------------------|
| 50%                             | 50%                           |                                            |
| 1 current soil erosion rate     | current soil erosion rate     | current soil erosion rate                  |
| 2 current soil erosion rate     | >= <b>up to 25% reduction</b> | <b>reduction in wind OR water erosion</b>  |
| 3 >= <b>up to 25% reduction</b> | current soil erosion rate     | <b>reduction in wind OR water erosion</b>  |
| 4 >= <b>up to 25% reduction</b> | >= <b>up to 25% reduction</b> | <b>reduction in wind AND water erosion</b> |

| Biomass availability                              | Climate change           | Fertilizer application          | Socioeconomic Indicators               |
|---------------------------------------------------|--------------------------|---------------------------------|----------------------------------------|
| 40%                                               | 23%                      | 37%                             |                                        |
| 1 <b>decreased food availability</b>              | <b>worsening GHGs</b>    | *                               | <b>increased costs to stakeholders</b> |
| 2 <b>decreased food availability</b>              | <=status quo             | <=average fertilizer use        | <b>increased costs to stakeholders</b> |
| 3 <=status quo (no cellulosic bioenergy)          | <b>worsening GHGs</b>    | <=average fertilizer use        | <b>increased costs to stakeholders</b> |
| 4 <=status quo (no cellulosic bioenergy)          | <=status quo             | <b>increased fertilizer use</b> | <b>increased costs to stakeholders</b> |
| 5 <b>decreased food availability</b>              | >=mixed results          | <b>decreased fertilizer use</b> | mixed results for stakeholders         |
| 6 <b>decreased food availability</b>              | <b>improving GHGs</b>    | *                               | mixed results for stakeholders         |
| 7 *                                               | <b>improving GHGs</b>    | <b>increased fertilizer use</b> | mixed results for stakeholders         |
| 8 >=status quo (no cellulosic bioenergy)          | <b>worsening GHGs</b>    | <b>decreased fertilizer use</b> | mixed results for stakeholders         |
| 9 <b>feedstock available for food &amp; fuel</b>  | <b>worsening GHGs</b>    | *                               | mixed results for stakeholders         |
| 10 <b>feedstock available for food &amp; fuel</b> | *                        | <b>increased fertilizer use</b> | mixed results for stakeholders         |
| 11 status quo (no cellulosic bioenergy)           | mixed results:status quo | average fertilizer use          | status quo                             |
| 12 status quo (no cellulosic bioenergy)           | mixed results:status quo | <b>decreased fertilizer use</b> | <b>stakeholder benefit</b>             |
| 13 status quo (no cellulosic bioenergy)           | <b>improving GHGs</b>    | average fertilizer use          | <b>stakeholder benefit</b>             |
| 14 <b>feedstock available for food &amp; fuel</b> | mixed results:status quo | average fertilizer use          | <b>stakeholder benefit</b>             |
| 15 >=status quo (no cellulosic bioenergy)         | <b>improving GHGs</b>    | <b>decreased fertilizer use</b> | <b>multiple stakeholder benefits</b>   |
| 16 <b>feedstock available for food &amp; fuel</b> | >=mixed results          | <b>decreased fertilizer use</b> | <b>multiple stakeholder benefits</b>   |
| 17 <b>feedstock available for food &amp; fuel</b> | <b>improving GHGs</b>    | >=average fertilizer use        | <b>multiple stakeholder benefits</b>   |

| corn grain                    | corn residues                | switchgrass                  | rye cover crop | Biomass availability                           |
|-------------------------------|------------------------------|------------------------------|----------------|------------------------------------------------|
| 70%                           | 13%                          | 17%                          | 0%             |                                                |
| 1 <b>decreased corn yield</b> | *                            | *                            | *              | <b>decreased food availability</b>             |
| 2 >=average corn yield        | no stover removals           | no switchgrass plantings     | *              | status quo (no cellulosic bioenergy)           |
| 3 >=average corn yield        | *                            | <b>switchgrass plantings</b> | *              | <b>feedstock available for food &amp; fuel</b> |
| 4 >=average corn yield        | >= <b>30% stover removal</b> | *                            | *              | <b>feedstock available for food &amp; fuel</b> |

| soil carbon                         | methane emissions          | Climate change        |
|-------------------------------------|----------------------------|-----------------------|
| 43%                                 | 57%                        |                       |
| 1 <b>loss of soil carbon</b>        | *                          | <b>worsening GHGs</b> |
| 2 >= <b>increase in soil carbon</b> | <b>increased emissions</b> | mixed results         |
| 3 >= <b>increase in soil carbon</b> | status quo                 | <b>improving GHGs</b> |

## Average weights

| Attribute                         | Local | Global | Loc.norm. | Glob.norm. |
|-----------------------------------|-------|--------|-----------|------------|
| <b>Landscape Sustainability</b>   |       |        |           |            |
| — <b>Environmental Indicators</b> | 70    | 70     | 53        | 53         |
| — Biodiversity                    | 17    | 12     | 14        | 8          |
| — <b>Soil Quality</b>             | 51    | 35     | 43        | 23         |
| — Soil condition                  | 86    | 30     | 86        | 20         |
| — <b>Soil retention</b>           | 14    | 5      | 14        | 3          |
| — water erosion                   | 50    | 3      | 50        | 2          |
| — wind erosion                    | 50    | 3      | 50        | 2          |
| — Water quality                   | 33    | 23     | 42        | 22         |
| — <b>Socioeconomic Indicators</b> | 30    | 30     | 47        | 47         |
| — <b>Biomass availability</b>     | 40    | 12     | 36        | 17         |
| — corn grain                      | 70    | 9      | 77        | 13         |
| — corn residues                   | 13    | 2      | 14        | 2          |
| — switchgrass                     | 17    | 2      | 9         | 2          |
| — rye cover crop                  | 0     | 0      | 0         | 0          |
| — <b>Climate change</b>           | 23    | 7      | 30        | 14         |
| — soil carbon                     | 43    | 3      | 60        | 8          |
| — methane emissions               | 57    | 4      | 40        | 6          |
| — Fertilizer application          | 37    | 11     | 33        | 15         |

## Evaluation results

| Attribute                         | Basecase                                  | Improved Management                        | Landscape Design A                             | Landscape Design B                             |
|-----------------------------------|-------------------------------------------|--------------------------------------------|------------------------------------------------|------------------------------------------------|
| <b>Landscape Sustainability</b>   | <b>adverse impacts</b>                    | mixed results                              | <i>some benefit</i>                            | <i>multiple benefits</i>                       |
| └ <b>Environmental Indicators</b> | <b>declining environmental conditions</b> | <i>improving environmental conditions</i>  | <i>improving environmental conditions</i>      | <i>improving environmental conditions</i>      |
| └ └ Biodiversity                  | no grassland added                        | no grassland added                         | <i>switchgrass plantings</i>                   | <i>switchgrass plantings + CRP acres</i>       |
| └ └ <b>Soil Quality</b>           | <b>deteriorating soil quality</b>         | <i>improving soil quality</i>              | <i>improving soil quality</i>                  | <i>improving soil quality</i>                  |
| └ └ └ Soil condition              | <b>negative SCI value</b>                 | <i>positive SCI value</i>                  | <i>positive SCI value</i>                      | <i>SCI value &gt; 0.5</i>                      |
| └ └ └ <b>Soil retention</b>       | current soil erosion rate                 | <i>reduction in wind AND water erosion</i> | <i>reduction in wind AND water erosion</i>     | <i>reduction in wind AND water erosion</i>     |
| └ └ └ └ water erosion             | current soil erosion rate                 | <i>25-50% reduction</i>                    | <i>25-50% reduction</i>                        | <i>&gt; 50% reduction</i>                      |
| └ └ └ └ wind erosion              | current soil erosion rate                 | <i>&gt; 50% reduction</i>                  | <i>&gt; 50% reduction</i>                      | <i>&gt; 50% reduction</i>                      |
| └ └ └ Water quality               | <b>current leaching rate</b>              | up to 25% reduction                        | <i>&gt; 50% reduction</i>                      | <i>&gt; 50% reduction</i>                      |
| └ <b>Socioeconomic Indicators</b> | <b>increased costs to stakeholders</b>    | <b>increased costs to stakeholders</b>     | mixed results for stakeholders                 | <i>multiple stakeholder benefits</i>           |
| └ └ <b>Biomass availability</b>   | status quo (no cellulosic bioenergy)      | status quo (no cellulosic bioenergy)       | <i>feedstock available for food &amp; fuel</i> | <i>feedstock available for food &amp; fuel</i> |
| └ └ └ corn grain                  | average corn yield                        | <i>increased corn yield</i>                | <i>increased corn yield</i>                    | <i>increased corn yield</i>                    |
| └ └ └ corn residues               | no stover removals                        | no stover removals                         | <i>30% stover removal</i>                      | <i>45% stover removal</i>                      |
| └ └ └ switchgrass                 | no switchgrass plantings                  | no switchgrass plantings                   | <i>switchgrass plantings</i>                   | <i>switchgrass plantings</i>                   |
| └ └ └ rye cover crop              | no cover crop                             | no cover crop                              | <i>cover crop</i>                              | <i>cover crop</i>                              |
| └ └ <b>Climate change</b>         | <b>worsening GHGs</b>                     | <b>worsening GHGs</b>                      | mixed results                                  | mixed results                                  |
| └ └ └ soil carbon                 | <b>loss of soil carbon</b>                | <b>loss of soil carbon</b>                 | <i>increase in soil carbon</i>                 | <i>carbon sequestered</i>                      |
| └ └ └ methane                     | status quo                                | status quo                                 | <b>increased emissions</b>                     | <b>increased emissions</b>                     |
| emissions                         |                                           |                                            |                                                |                                                |
| └ Fertilizer application          | average fertilizer use                    | <b>increased fertilizer use</b>            | <b>increased fertilizer use</b>                | <i>decreased fertilizer use</i>                |
