# Supplementary material
Source: MDPI journal article supplement (https://www.mdpi.com/2071-1050/15/13/10051)
Supplement: s1 [file s1 › DEXi Report_SouthForkWatershed.pdf]

## Model description

Iowa Landscape Design MADSS: South Fork Watershed

This Multi-Attribute Decision Support System (MADSS) was built by Oak Ridge National Laboratory (ORNL) to evaluate the relative sustainability of four alternative landscapes considered by the Antares-led Iowa Landscape Design project consortium for the US Department of Energy (DOE) BioEnergy Technologies Office (BETO). The model was built using quantitative results from ArcGIS analyses of the South Fork watershed located in north central Iowa. The analyses were based on subfield-scale results output from combinations of Profit Zone Manager (PZM) calculations for 2013-2016 and 7 AgSolver management scenarios developed by EFC Systems and provided to Antares Group LLC.

Please contact Dr. Esther Parish of ORNL at [parishes@ornl.gov](mailto:parishes@ornl.gov) for further information.

## Attribute tree

| Attribute                         | Description                                                                                                                         |
|-----------------------------------|-------------------------------------------------------------------------------------------------------------------------------------|
| <b>Landscape Sustainability</b>   | Aggregation of indicators derived from AgSolver runs prepared for the Antares Iowa Landscape Design project.                        |
| └ <b>Environmental Indicators</b> | Measurements related to biodiversity habitat, soil quality and water quality                                                        |
| └ └ Biodiversity                  | Additional grassland acres for birds and pollinators; includes switchgrass plantings and Conservation Reserve Program (CRP) grasses |
| └ └ <b>Soil Quality</b>           | Indicators of soil quality                                                                                                          |
| └ └ └ Soil condition              | Soil conditioning index (SCI)                                                                                                       |
| └ └ └ <b>Soil retention</b>       | Avoided soil erosion by wind and water (total tons)                                                                                 |
| └ └ └ └ Water erosion             | Tons of soil eroded by water across the area on an annual basis                                                                     |
| └ └ └ └ Wind erosion              | Tons of soil eroded by wind across the area on an annual basis                                                                      |
| └ └ Water quality                 | Reduced levels of nitrate leaching (pounds NO <sub>3</sub> avoided in water bodies)                                                 |
| └ <b>Socioeconomic Indicators</b> | Measures related to feedstock availability, management inputs and climate change                                                    |
| └ └ <b>Biomass availability</b>   | Feedstock availability for food and fuel                                                                                            |
| └ └ └ Corn grain                  | Average yield of corn harvested from 2013-2016                                                                                      |
| └ └ └ Corn residues               | Corn stover removed from fields with slopes < 5% and average corn yields >= 165 bu/acre                                             |
| └ └ └ Switchgrass                 | Switchgrass harvested from perennial fields (tons/acre)                                                                             |
| └ └ └ Rye                         | Rye cover crop planted on top of corn                                                                                               |
| └ └ <b>Climate change</b>         | Net carbon loss and/or sequestration                                                                                                |
| └ └ └ Soil carbon                 | Net change in soil organic carbon (SOC) in pounds/year                                                                              |
| └ └ └ Methane emissions           | CH <sub>4</sub> released from agricultural fields (net flux in in pounds/year)                                                      |
| └ └ Fertilizer application        | Volume of ammonia added to fields through injection (lbs NO <sub>3</sub> )                                                          |

# Scales

| Attribute                       | Scale                                                                                                                                                  |
|---------------------------------|--------------------------------------------------------------------------------------------------------------------------------------------------------|
| <b>Landscape Sustainability</b> | <b>adverse impacts</b> ; mixed results; status quo; <b>some benefit</b> ; <b>multiple benefits</b>                                                     |
| <b>Environmental Indicators</b> | <b>declining environmental conditions</b> ; mixed environmental conditions; <b>improving environmental conditions</b>                                  |
| Biodiversity                    | No grassland added; <b>Switchgrass plantings</b> ; <b>Switchgrass plantings + CRP acres</b>                                                            |
| <b>Soil Quality</b>             | <b>deteriorating soil quality</b> ; stable soil quality; <b>improving soil quality</b>                                                                 |
| Soil condition                  | <b>Negative SCI value</b> ; <b>Positive SCI value</b> ; <b>SCI value &gt; 0.5</b>                                                                      |
| <b>Soil retention</b>           | current soil erosion rate; <b>reduction in wind OR water erosion</b> ; <b>reduction in wind AND water erosion</b>                                      |
| Water erosion                   | current soil erosion rate; <b>up to 25% reduction</b> ; <b>25-50% reduction</b> ; <b>&gt; 50% reduction</b>                                            |
| Wind erosion                    | current soil erosion rate; <b>up to 25% reduction</b> ; <b>25-50% reduction</b> ; <b>&gt; 50% reduction</b>                                            |
| Water quality                   | <b>current leaching rate</b> ; up to 25% reduction; <b>25-50% reduction</b> ; <b>&gt;50% reduction</b>                                                 |
| <b>Socioeconomic Indicators</b> | <b>increased costs to stakeholders</b> ; mixed results for stakeholders; status quo; <b>stakeholder benefit</b> ; <b>multiple stakeholder benefits</b> |
| <b>Biomass availability</b>     | <b>decreased food availability</b> ; status quo (no cellulosic bioenergy); <b>feedstock available for food &amp; fuel</b>                              |
| Corn grain                      | <b>decreased corn yield</b> ; average corn yield; <b>increased corn yield</b>                                                                          |
| Corn residues                   | no stover removals; <b>30% stover removal</b> ; <b>45% stover removal</b>                                                                              |
| Switchgrass                     | no switchgrass plantings; <b>switchgrass plantings</b>                                                                                                 |
| Rye                             | no cover crop; <b>cover crop</b>                                                                                                                       |
| <b>Climate change</b>           | <b>worsening GHGs</b> ; mixed results; status quo; <b>improving GHGs</b>                                                                               |
| Soil carbon                     | <b>loss of soil carbon</b> ; <b>increase in soil carbon</b> ; <b>carbon sequestered</b>                                                                |
| Methane emissions               | <b>Increased emissions</b> ; Status quo                                                                                                                |
| Fertilizer application          | <b>increased fertilizer use</b> ; average fertilizer use; <b>decreased fertilizer use</b>                                                              |

## Landscape Sustainability

Aggregation of indicators derived from AgSolver runs prepared for the Antares Iowa Landscape Design project.

1. **adverse impacts**
2. mixed results
3. status quo
4. **some benefit**
5. **multiple benefits**

## Environmental Indicators

Measurements related to biodiversity habitat, soil quality and water quality

1. **declining environmental conditions**
2. mixed environmental conditions
3. **improving environmental conditions**

## Biodiversity

Additional grassland acres for birds and pollinators; includes switchgrass plantings and Conservation Reserve Program (CRP) grasses

1. No grassland added No switchgrass plantings or additional CRP acres
2. **Switchgrass plantings** Switchgrass planted on clustered low ROI acres
3. **Switchgrass plantings + CRP acres** Switchgrass planted on clustered low ROI acres; remaining low ROI acres enrolled in CRP

## Soil Quality

Indicators of soil quaility

1. **deteriorating soil quality** based on SCI and erosion rates
2. stable soil quality based on SCI and erosion rates
3. **improving soil quality** based on SCI and erosion rates

## Soil condition

Soil conditioning index (SCI)

1. **Negative SCI value** Loss of soil organic matter
2. **Positive SCI value** Increase in soil organic matter
3. **SCI value > 0.5** Large increase in soil organic matter

## Soil retention

Avoided soil erosion by wind and water (total tons)

1. current soil erosion rate tons of soil eroded under basecase conditions
2. **reduction in wind OR water erosion** tons of sediment eroded relative to basecase
3. **reduction in wind AND water erosion** tons of sediment eroded relative to basecase

## Water erosion

Tons of soil eroded by water across the area on an annual basis

1. current soil erosion rate tons of soil eroded under basecase conditions
2. **up to 25% reduction** tons of sediment eroded relative to basecase
3. **25-50% reduction** tons of sediment eroded relative to basecase
4. **> 50% reduction** tons of sediment eroded relative to basecase

## Wind erosion

Tons of soil eroded by wind across the area on an annual basis

1. current soil erosion rate tons of soil eroded under basecase conditions
2. **up to 25% reduction** tons of sediment eroded relative to basecase
3. **25-50% reduction** tons of sediment eroded relative to basecase
4. **> 50% reduction** tons of sediment eroded relative to basecase

## Water quality

Reduced levels of nitrate leaching (pounds NO<sub>3</sub> avoided in water bodies)

1. **current leaching rate** pounds of NO<sub>3</sub> leached under basecase conditions
2. up to 25% reduction pounds of NO<sub>3</sub> leached relative to baseline
3. **25-50% reduction** pounds of NO<sub>3</sub> leached relative to baseline
4. **>50% reduction** pounds of NO<sub>3</sub> leached relative to baseline

## Socioeconomic Indicators

Measures related to feedstock availability, management inputs and climate change

1. **increased costs to stakeholders** includes food insecurity and/or increased climate change contributions
2. mixed results for stakeholders
3. status quo
4. **stakeholder benefit**
5. **multiple stakeholder benefits** includes feedstock diversity, GHG reductions, and/or reduced inputs

## Biomass availability

Feedstock availability for food and fuel

1. **decreased food availability** marked decrease in corn yields and/or acres
2. status quo (no cellulosic bioenergy) all modeled acres allocated to corn/soy rotation
3. **feedstock available for food & fuel** switchgrass and stover removals integrated with corn/soy

## Corn grain

Average yield of corn harvested from 2013-2016

1. **decreased corn yield**
2. average corn yield average bushels/acre across modeled area
3. **increased corn yield**

## Corn residues

Corn stover removed from fields with slopes < 5% and average corn yields >= 165 bu/acre

1. no stover removals
2. **30% stover removal**
3. **45% stover removal**

## Switchgrass

Switchgrass harvested from perennial fields (tons/acre)

1. no switchgrass plantings all acres left in traditional corn/soy rotation
2. **switchgrass plantings** switchgrass replacing corn on clustered low ROI lands

## Rye

Rye cover crop planted on top of corn

1. no cover crop no rye planted over corn
2. **cover crop** rye cover crop assumed to yield 4000 lb/acre

## Climate change

Net carbon loss and/or sequestration

1. **worsening GHGs** lower SOC & larger CH<sub>4</sub> release
2. mixed results opposite trends between SOC & methane emissions
3. status quo no change from basecase values
4. **improving GHGs** increased SOC & smaller CH<sub>4</sub> release

## Soil carbon

Net change in soil organic carbon (SOC) in pounds/year

1. **loss of soil carbon** total net change in SOC is negative across the area
2. **increase in soil carbon** net positive change in SOC across the area
3. **carbon sequestered** magnitude of net SOC gain more than offsets magnitude of net loss under basecase

## Methane emissions

CH<sub>4</sub> released from agricultural fields (net flux in in pounds/year)

1. **Increased emissions** Larger release of methane across the modeled land area
2. Status quo Basecase methane emission levels

## Fertilizer application

Volume of ammonia added to fields through injection (lbs NO<sub>3</sub>)

1. **increased fertilizer use** larger volume of NH<sub>3</sub> relative to basecase
2. average fertilizer use basecase NH<sub>3</sub> volume
3. **decreased fertilizer use** smaller volume of NH<sub>3</sub> relative to basecase

## Functions

| Attribute                         | Rules | Defined | Determined | Values                                                                                                                                   |
|-----------------------------------|-------|---------|------------|------------------------------------------------------------------------------------------------------------------------------------------|
| <b>Landscape Sustainability</b>   | 15/15 | 100.00% | 100.00%    | adverse impacts:4,mixed results:3,status quo:2,some benefit:4,multiple benefits:2                                                        |
| └ <b>Environmental Indicators</b> | 36/36 | 100.00% | 100.00%    | declining environmental conditions:4,mixed environmental conditions:15,improving environmental conditions:17                             |
| └└ Biodiversity                   |       |         |            |                                                                                                                                          |
| └└ <b>Soil Quality</b>            | 9/9   | 100.00% | 100.00%    | deteriorating soil quality:3,stable soil quality:1,improving soil quality:5                                                              |
| └└└ Soil condition                |       |         |            |                                                                                                                                          |
| └└└ <b>Soil retention</b>         | 16/16 | 100.00% | 100.00%    | current soil erosion rate:1,reduction in wind OR water erosion:6,reduction in wind AND water erosion:9                                   |
| └└└└ Water erosion                |       |         |            |                                                                                                                                          |
| └└└└ Wind erosion                 |       |         |            |                                                                                                                                          |
| └└ Water quality                  |       |         |            |                                                                                                                                          |
| └ <b>Socioeconomic Indicators</b> | 36/36 | 100.00% | 100.00%    | increased costs to stakeholders:11,mixed results for stakeholders:13,status quo:2, stakeholder benefit:5,multiple stakeholder benefits:5 |
| └└ <b>Biomass availability</b>    | 36/36 | 100.00% | 100.00%    | decreased food availability:12,status quo (no cellulosic bioenergy):4,feedstock available for food & fuel:20                             |
| └└└ Corn grain                    |       |         |            |                                                                                                                                          |
| └└└ Corn residues                 |       |         |            |                                                                                                                                          |
| └└└ Switchgrass                   |       |         |            |                                                                                                                                          |
| └└└ Rye                           |       |         |            |                                                                                                                                          |
| └└└ <b>Climate change</b>         | 6/6   | 100.00% | 100.00%    | worsening GHGs:2,mixed results:2,status quo:0,improving GHGs:2                                                                           |
| └└└└ Soil carbon                  |       |         |            |                                                                                                                                          |
| └└└└ Methane emissions            |       |         |            |                                                                                                                                          |
| └└ Fertilizer application         |       |         |            |                                                                                                                                          |

## Tables

| Environmental Indicators                    | Socioeconomic Indicators                  | Landscape Sustainability |
|---------------------------------------------|-------------------------------------------|--------------------------|
| 70%                                         | 30%                                       |                          |
| 1 <b>declining environmental conditions</b> | <=status quo                              | <b>adverse impacts</b>   |
| 2 <=mixed environmental conditions          | <b>increased costs to stakeholders</b>    | <b>adverse impacts</b>   |
| 3 <b>declining environmental conditions</b> | >= <b>stakeholder benefit</b>             | mixed results            |
| 4 <b>improving environmental conditions</b> | <b>increased costs to stakeholders</b>    | mixed results            |
| 5 mixed environmental conditions            | mixed results for stakeholders:status quo | status quo               |
| 6 mixed environmental conditions            | >= <b>stakeholder benefit</b>             | <b>some benefit</b>      |
| 7 <b>improving environmental conditions</b> | mixed results for stakeholders:status quo | <b>some benefit</b>      |
| 8 <b>improving environmental conditions</b> | >= <b>stakeholder benefit</b>             | <b>multiple benefits</b> |

| Biodiversity                         | Soil Quality               | Water quality         | Environmental Indicators           |
|--------------------------------------|----------------------------|-----------------------|------------------------------------|
| 17%                                  | 51%                        | 33%                   |                                    |
| 1 No grassland added                 | deteriorating soil quality | <=up to 25% reduction | declining environmental conditions |
| 2 No grassland added                 | <=stable soil quality      | current leaching rate | declining environmental conditions |
| 3 <=Switchgrass plantings            | deteriorating soil quality | current leaching rate | declining environmental conditions |
| 4 *                                  | deteriorating soil quality | >=25-50% reduction    | mixed environmental conditions     |
| 5 No grassland added                 | stable soil quality        | up to 25% reduction   | mixed environmental conditions     |
| 6 *                                  | improving soil quality     | current leaching rate | mixed environmental conditions     |
| 7 >=Switchgrass plantings            | deteriorating soil quality | >=up to 25% reduction | mixed environmental conditions     |
| 8 >=Switchgrass plantings            | >=stable soil quality      | current leaching rate | mixed environmental conditions     |
| 9 Switchgrass plantings + CRP acres  | deteriorating soil quality | *                     | mixed environmental conditions     |
| 10 Switchgrass plantings + CRP acres | *                          | current leaching rate | mixed environmental conditions     |
| 11 *                                 | >=stable soil quality      | >=25-50% reduction    | improving environmental conditions |
| 12 *                                 | improving soil quality     | >=up to 25% reduction | improving environmental conditions |
| 13 >=Switchgrass plantings           | >=stable soil quality      | >=up to 25% reduction | improving environmental conditions |

| Soil condition         | Soil retention                       | Soil Quality               |
|------------------------|--------------------------------------|----------------------------|
| 86%                    | 14%                                  |                            |
| 1 Negative SCI value   | *                                    | deteriorating soil quality |
| 2 Positive SCI value   | current soil erosion rate            | stable soil quality        |
| 3 >=Positive SCI value | >=reduction in wind OR water erosion | improving soil quality     |
| 4 SCI value > 0.5      | *                                    | improving soil quality     |

| Water erosion               | Wind erosion              | Soil retention                      |
|-----------------------------|---------------------------|-------------------------------------|
| 50%                         | 50%                       |                                     |
| 1 current soil erosion rate | current soil erosion rate | current soil erosion rate           |
| 2 current soil erosion rate | >=up to 25% reduction     | reduction in wind OR water erosion  |
| 3 >=up to 25% reduction     | current soil erosion rate | reduction in wind OR water erosion  |
| 4 >=up to 25% reduction     | >=up to 25% reduction     | reduction in wind AND water erosion |

| Biomass availability                              | Climate change           | Fertilizer application          | Socioeconomic Indicators               |
|---------------------------------------------------|--------------------------|---------------------------------|----------------------------------------|
| 40%                                               | 23%                      | 37%                             |                                        |
| 1 <b>decreased food availability</b>              | <b>worsening GHGs</b>    | *                               | <b>increased costs to stakeholders</b> |
| 2 <b>decreased food availability</b>              | <=status quo             | <=average fertilizer use        | <b>increased costs to stakeholders</b> |
| 3 <=status quo (no cellulosic bioenergy)          | <b>worsening GHGs</b>    | <=average fertilizer use        | <b>increased costs to stakeholders</b> |
| 4 <=status quo (no cellulosic bioenergy)          | <=status quo             | <b>increased fertilizer use</b> | <b>increased costs to stakeholders</b> |
| 5 <b>decreased food availability</b>              | >=mixed results          | <b>decreased fertilizer use</b> | mixed results for stakeholders         |
| 6 <b>decreased food availability</b>              | <b>improving GHGs</b>    | *                               | mixed results for stakeholders         |
| 7 *                                               | <b>improving GHGs</b>    | <b>increased fertilizer use</b> | mixed results for stakeholders         |
| 8 >=status quo (no cellulosic bioenergy)          | <b>worsening GHGs</b>    | <b>decreased fertilizer use</b> | mixed results for stakeholders         |
| 9 <b>feedstock available for food &amp; fuel</b>  | <b>worsening GHGs</b>    | *                               | mixed results for stakeholders         |
| 10 <b>feedstock available for food &amp; fuel</b> | *                        | <b>increased fertilizer use</b> | mixed results for stakeholders         |
| 11 status quo (no cellulosic bioenergy)           | mixed results:status quo | average fertilizer use          | status quo                             |
| 12 status quo (no cellulosic bioenergy)           | mixed results:status quo | <b>decreased fertilizer use</b> | <b>stakholder benefit</b>              |
| 13 status quo (no cellulosic bioenergy)           | <b>improving GHGs</b>    | average fertilizer use          | <b>stakholder benefit</b>              |
| 14 <b>feedstock available for food &amp; fuel</b> | mixed results:status quo | average fertilizer use          | <b>stakholder benefit</b>              |
| 15 >=status quo (no cellulosic bioenergy)         | <b>improving GHGs</b>    | <b>decreased fertilizer use</b> | <b>multiple stakeholder benefits</b>   |
| 16 <b>feedstock available for food &amp; fuel</b> | >=mixed results          | <b>decreased fertilizer use</b> | <b>multiple stakeholder benefits</b>   |
| 17 <b>feedstock available for food &amp; fuel</b> | <b>improving GHGs</b>    | >=average fertilizer use        | <b>multiple stakeholder benefits</b>   |

| Corn grain                    | Corn residues                | Switchgrass                  | Rye | Biomass availability                           |
|-------------------------------|------------------------------|------------------------------|-----|------------------------------------------------|
| 70%                           | 13%                          | 17%                          | 0%  |                                                |
| 1 <b>decreased corn yield</b> | *                            | *                            | *   | <b>decreased food availability</b>             |
| 2 >=average corn yield        | no stover removals           | no switchgrass plantings     | *   | status quo (no cellulosic bioenergy)           |
| 3 >=average corn yield        | *                            | <b>switchgrass plantings</b> | *   | <b>feedstock available for food &amp; fuel</b> |
| 4 >=average corn yield        | >= <b>30% stover removal</b> | *                            | *   | <b>feedstock available for food &amp; fuel</b> |

| Soil carbon                         | Methane emissions          | Climate change        |
|-------------------------------------|----------------------------|-----------------------|
| 43%                                 | 57%                        |                       |
| 1 <b>loss of soil carbon</b>        | *                          | <b>worsening GHGs</b> |
| 2 >= <b>increase in soil carbon</b> | <b>Increased emissions</b> | mixed results         |
| 3 >= <b>increase in soil carbon</b> | Status quo                 | <b>improving GHGs</b> |

## Average weights

| Attribute                         | Local | Global | Loc.norm. | Glob.norm. |
|-----------------------------------|-------|--------|-----------|------------|
| <b>Landscape Sustainability</b>   |       |        |           |            |
| — <b>Environmental Indicators</b> | 70    | 70     | 53        | 53         |
| — Biodiversity                    | 17    | 12     | 14        | 8          |
| — <b>Soil Quality</b>             | 51    | 35     | 43        | 23         |
| — Soil condition                  | 86    | 30     | 86        | 20         |
| — <b>Soil retention</b>           | 14    | 5      | 14        | 3          |
| — Water erosion                   | 50    | 3      | 50        | 2          |
| — Wind erosion                    | 50    | 3      | 50        | 2          |
| — Water quality                   | 33    | 23     | 42        | 22         |
| — <b>Socioeconomic Indicators</b> | 30    | 30     | 47        | 47         |
| — <b>Biomass availability</b>     | 40    | 12     | 36        | 17         |
| — Corn grain                      | 70    | 9      | 77        | 13         |
| — Corn residues                   | 13    | 2      | 14        | 2          |
| — Switchgrass                     | 17    | 2      | 9         | 2          |
| — Rye                             | 0     | 0      | 0         | 0          |
| — <b>Climate change</b>           | 23    | 7      | 30        | 14         |
| — Soil carbon                     | 43    | 3      | 60        | 8          |
| — Methane emissions               | 57    | 4      | 40        | 6          |
| — Fertilizer application          | 37    | 11     | 33        | 15         |

## Evaluation results

| Attribute                         | Basecase                                  | Improved Management                        | Landscape Design A                             | Landscape Design B                             |
|-----------------------------------|-------------------------------------------|--------------------------------------------|------------------------------------------------|------------------------------------------------|
| <b>Landscape Sustainability</b>   | <b>adverse impacts</b>                    | mixed results                              | <i>multiple benefits</i>                       | <i>multiple benefits</i>                       |
| └ <b>Environmental Indicators</b> | <b>declining environmental conditions</b> | <i>improving environmental conditions</i>  | <i>improving environmental conditions</i>      | <i>improving environmental conditions</i>      |
| └ └ Biodiversity                  | No grassland added                        | No grassland added                         | <i>Switchgrass plantings</i>                   | <i>Switchgrass plantings + CRP acres</i>       |
| └ └ <b>Soil Quality</b>           | stable soil quality                       | <i>improving soil quality</i>              | <i>improving soil quality</i>                  | <i>improving soil quality</i>                  |
| └ └ └ Soil condition              | <i>Positive SCI value</i>                 | <i>SCI value &gt; 0.5</i>                  | <i>SCI value &gt; 0.5</i>                      | <i>SCI value &gt; 0.5</i>                      |
| └ └ <b>Soil retention</b>         | current soil erosion rate                 | <i>reduction in wind AND water erosion</i> | <i>reduction in wind AND water erosion</i>     | <i>reduction in wind AND water erosion</i>     |
| └ └ └ Water erosion               | current soil erosion rate                 | <i>25-50% reduction</i>                    | <i>25-50% reduction</i>                        | <i>&gt; 50% reduction</i>                      |
| └ └ └ Wind erosion                | current soil erosion rate                 | <i>&gt; 50% reduction</i>                  | <i>25-50% reduction</i>                        | <i>25-50% reduction</i>                        |
| └ └ └ Water quality               | <b>current leaching rate</b>              | up to 25% reduction                        | <i>&gt;50% reduction</i>                       | <i>&gt;50% reduction</i>                       |
| └ <b>Socioeconomic Indicators</b> | <b>increased costs to stakeholders</b>    | <b>increased costs to stakeholders</b>     | <i>multiple stakeholder benefits</i>           | <i>multiple stakeholder benefits</i>           |
| └ └ <b>Biomass availability</b>   | status quo (no cellulosic bioenergy)      | status quo (no cellulosic bioenergy)       | <i>feedstock available for food &amp; fuel</i> | <i>feedstock available for food &amp; fuel</i> |
| └ └ └ Corn grain                  | average corn yield                        | <i>increased corn yield</i>                | <i>increased corn yield</i>                    | <i>increased corn yield</i>                    |
| └ └ └ Corn residues               | no stover removals                        | no stover removals                         | <i>30% stover removal</i>                      | <i>45% stover removal</i>                      |
| └ └ └ Switchgrass                 | no switchgrass plantings                  | no switchgrass plantings                   | <i>switchgrass plantings</i>                   | <i>switchgrass plantings</i>                   |
| └ └ └ Rye                         | no cover crop                             | no cover crop                              | <i>cover crop</i>                              | <i>cover crop</i>                              |
| └ └ <b>Climate change</b>         | <b>worsening GHGs</b>                     | <b>worsening GHGs</b>                      | <i>improving GHGs</i>                          | mixed results                                  |
| └ └ └ Soil carbon                 | <b>loss of soil carbon</b>                | <b>loss of soil carbon</b>                 | <i>increase in soil carbon</i>                 | <i>increase in soil carbon</i>                 |
| └ └ └ Methane emissions           | Status quo                                | Status quo                                 | Status quo                                     | <b>Increased emissions</b>                     |
| └ └ Fertilizer application        | average fertilizer use                    | <b>increased fertilizer use</b>            | average fertilizer use                         | <i>decreased fertilizer use</i>                |
